# Supplementary material for: Cytotoxic cis-ruthenium(iii) bis(amidine) complexes
Source: Royal Society of Chemistry journal article supplement (doi:10.1039/d3dt00328k), 2023-01-01
Supplement: d3dt00328k1.pdf [file d3dt00328k1.pdf]

## Supplementary Information

### Cytotoxic *cis*-ruthenium(III) bis(amidine) complexes

Tao Liu,<sup>a</sup> Chen Pan,<sup>a</sup> Huatian Shi,<sup>b</sup> Tao Huang,<sup>a</sup> Yong-Liang Huang,<sup>a</sup> Yang-Yang Deng,<sup>a</sup>  
Wen-Xiu Ni<sup>\*,a</sup>, Wai-Lun Man<sup>\*,b</sup>

<sup>a</sup> Department of Medicinal Chemistry, Shantou University Medical College, Shantou, Guangdong, 515041, P.R. China.

<sup>b</sup> Department of Chemistry, Hong Kong Baptist University, Kowloon Tong, Hong Kong, P.R. China.

**Table S1** Crystallographic data of [6](CF<sub>3</sub>SO<sub>3</sub>).

|                                   |                                                                                                                                         |
|-----------------------------------|-----------------------------------------------------------------------------------------------------------------------------------------|
| Empirical formula                 | C <sub>27</sub> H <sub>50.23</sub> F <sub>3</sub> N <sub>4</sub> O <sub>7.11</sub> Ru S                                                 |
| Formula weight                    | 734.91                                                                                                                                  |
| Temperature                       | 100.00 K                                                                                                                                |
| Wavelength                        | 1.54184 Å                                                                                                                               |
| Crystal system, space group       | Triclinic, P-1                                                                                                                          |
| Unit cell dimensions              | a = 11.1355(2) Å    alpha = 105.416(2) deg.<br>b = 17.8642(3) Å    beta = 99.450(2) deg.<br>c = 19.5372(4) Å    gamma = 106.518(2) deg. |
| Volume                            | 3469.04(12) Å <sup>3</sup>                                                                                                              |
| Z, Calculated density             | 4, 1.407 Mg/m <sup>3</sup>                                                                                                              |
| Absorption coefficient            | 4.760 mm <sup>-1</sup>                                                                                                                  |
| F (000)                           | 1537                                                                                                                                    |
| Crystal size                      | 0.15 x 0.12 x 0.1 mm                                                                                                                    |
| Theta range for data collection   | 2.429 to 77.205 deg.                                                                                                                    |
| Limiting indices                  | -14<=h<=11, -21<=k<=22, -23<=l<=24                                                                                                      |
| Reflections collected / unique    | 48026 / 13744 [R(int) = 0.0670]                                                                                                         |
| Completeness to theta = 67.684    | 99.2 %                                                                                                                                  |
| Absorption correction             | Semi-empirical from equivalents                                                                                                         |
| Max. and min. transmission        | 1.00000 and 0.75222                                                                                                                     |
| Refinement method                 | Full-matrix least-squares on F <sup>2</sup>                                                                                             |
| Data / restraints / parameters    | 13744 / 0 / 804                                                                                                                         |
| Goodness-of-fit on F <sup>2</sup> | 1.049                                                                                                                                   |
| Final R indices [I>2sigma(I)]     | R1 = 0.0591, wR2 = 0.16                                                                                                                 |
| R indices (all data)              | R1 = 0.0710, wR2 = 0.1744                                                                                                               |
| Extinction coefficient            | n/a                                                                                                                                     |
| Largest diff. peak and hole       | 2.115 and -1.987 e.Å <sup>-3</sup>                                                                                                      |

**Table S2.** Selected bond distances (Å) and angles (deg) for **6**.

| Bond distances  |            |                 |            |
|-----------------|------------|-----------------|------------|
| Ru(1)-O(3)      | 2.007(3)   | Ru(2)-O(6)      | 2.007(3)   |
| Ru(1)-O(4)      | 2.030(3)   | Ru(2)-O(8)      | 2.015(3)   |
| Ru(1)-O(1)      | 2.019(3)   | Ru(2)-O(5)      | 2.029(3)   |
| Ru(1)-O(2)      | 2.040(3)   | Ru(2)-O(7)      | 2.042(3)   |
| Ru(1)-N(1)      | 2.034(3)   | Ru(2)-N(7)      | 2.025(3)   |
| Ru(1)-N(3)      | 2.038(4)   | Ru(2)-N(5)      | 2.045(4)   |
| Bond angles     |            |                 |            |
| O(3)-Ru(1)-O(4) | 93.15(11)  | O(6)-Ru(2)-O(8) | 178.76(11) |
| O(3)-Ru(1)-O(1) | 179.49(11) | O(6)-Ru(2)-O(5) | 93.30(11)  |
| O(3)-Ru(1)-O(2) | 87.86(12)  | O(6)-Ru(2)-O(7) | 87.44(11)  |
| O(3)-Ru(1)-N(1) | 84.82(13)  | O(6)-Ru(2)-N(7) | 85.12(13)  |
| O(3)-Ru(1)-N(3) | 91.49(13)  | O(6)-Ru(2)-N(5) | 91.02(13)  |
| O(4)-Ru(1)-O(2) | 87.93(12)  | O(8)-Ru(2)-O(5) | 87.86(11)  |
| O(4)-Ru(1)-N(1) | 177.58(12) | O(8)-Ru(2)-O(7) | 93.03(12)  |
| O(4)-Ru(1)-N(3) | 92.72(13)  | O(8)-Ru(2)-N(7) | 93.73(12)  |
| O(1)-Ru(1)-O(4) | 87.22(12)  | O(8)-Ru(2)-N(5) | 88.51(13)  |
| O(1)-Ru(1)-O(2) | 92.51(12)  | O(5)-Ru(2)-O(7) | 88.11(11)  |
| O(1)-Ru(1)-N(1) | 94.83(12)  | O(5)-Ru(2)-N(5) | 92.09(12)  |
| O(1)-Ru(1)-N(3) | 88.13(13)  | O(7)-Ru(2)-N(5) | 178.45(12) |
| N(1)-Ru(1)-O(2) | 90.69(12)  | N(7)-Ru(2)-O(5) | 178.07(12) |
| N(1)-Ru(1)-N(3) | 88.64(14)  | N(7)-Ru(2)-O(7) | 90.72(13)  |
| N(3)-Ru(1)-O(2) | 179.11(12) | N(7)-Ru(2)-N(5) | 89.04(14)  |

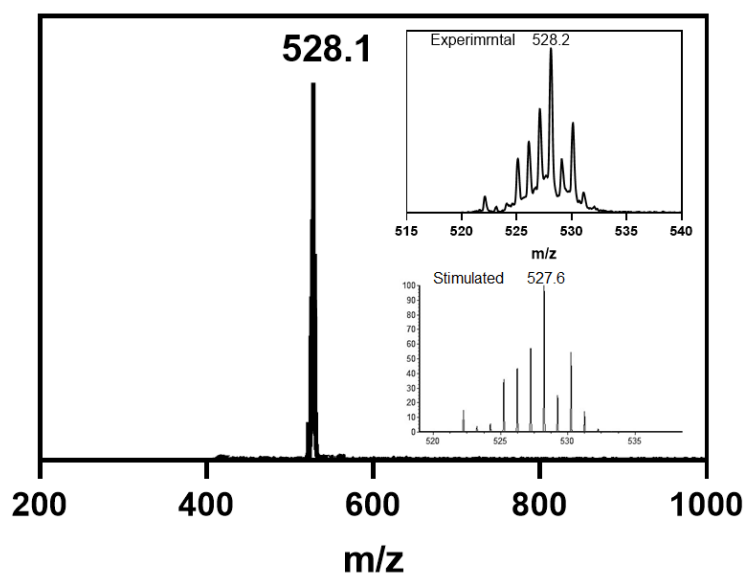

Figure S1. MALDI-TOF mass spectrum of complex 1.

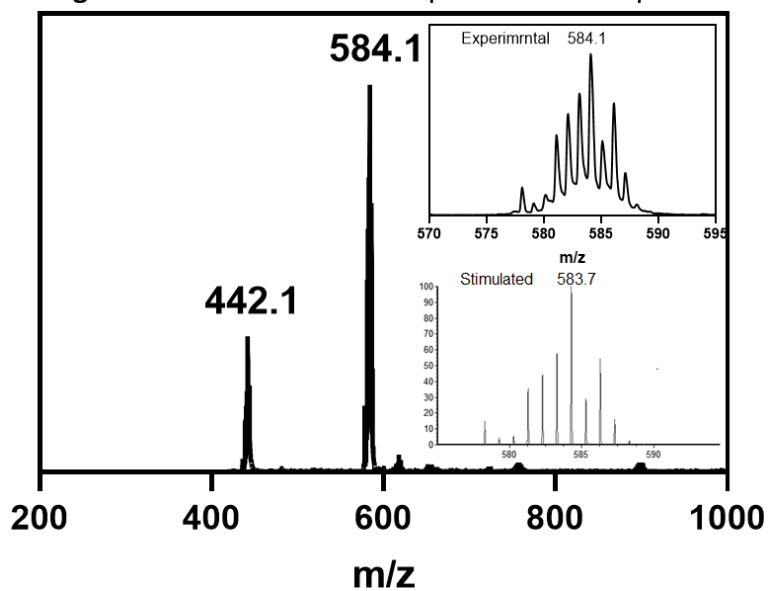

Figure S2. MALDI-TOF mass spectrum of complex 2.

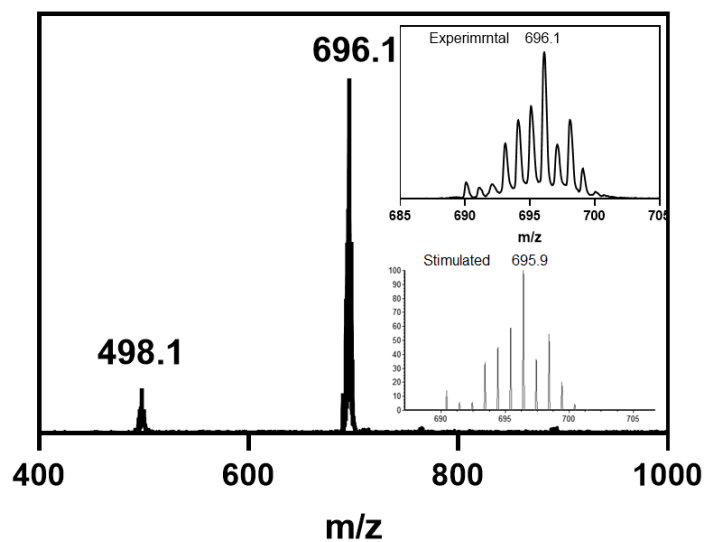

Figure S3. MALDI-TOF mass spectrum of complex 3.

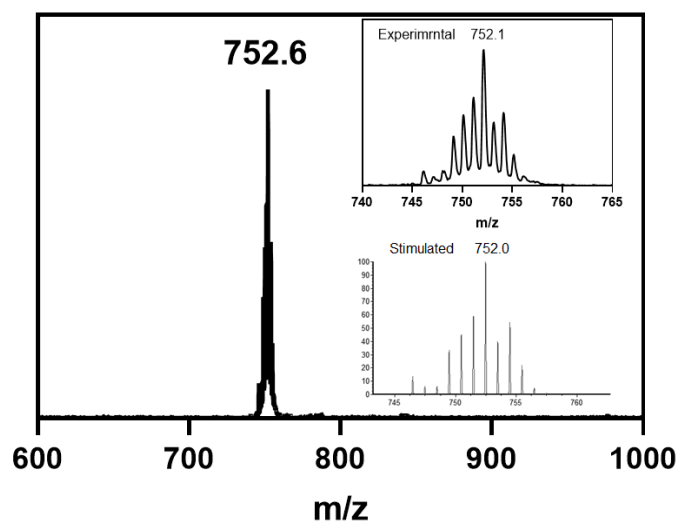

Figure S4. MALDI-TOF mass spectrum of complex 4.

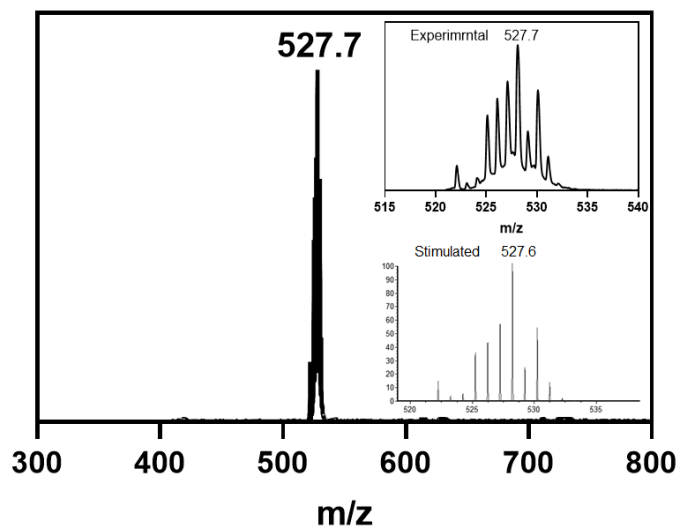

Figure S5. MALDI-TOF mass spectrum of complex 5.

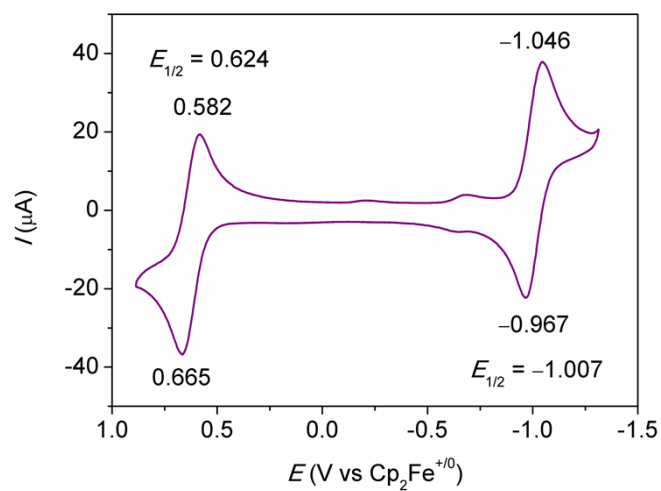

**Figure S6.** Cyclic voltammogram of **5** in CH<sub>3</sub>CN.

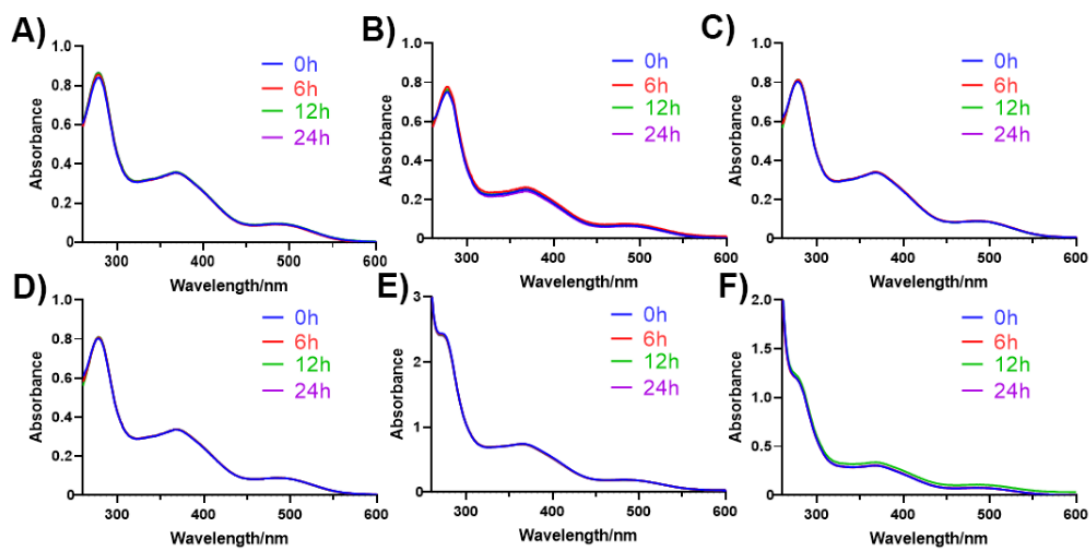

**Figure S7.** UV-vis spectra of complexes **1–6** in DMSO at different time intervals. (A) **1**, 50 μM (B) **2**, 50 μM (C) **3**, 50 μM (D) **4**, 50 μM (E) **5**, 100 μM and (F) **6**, 40 μM.

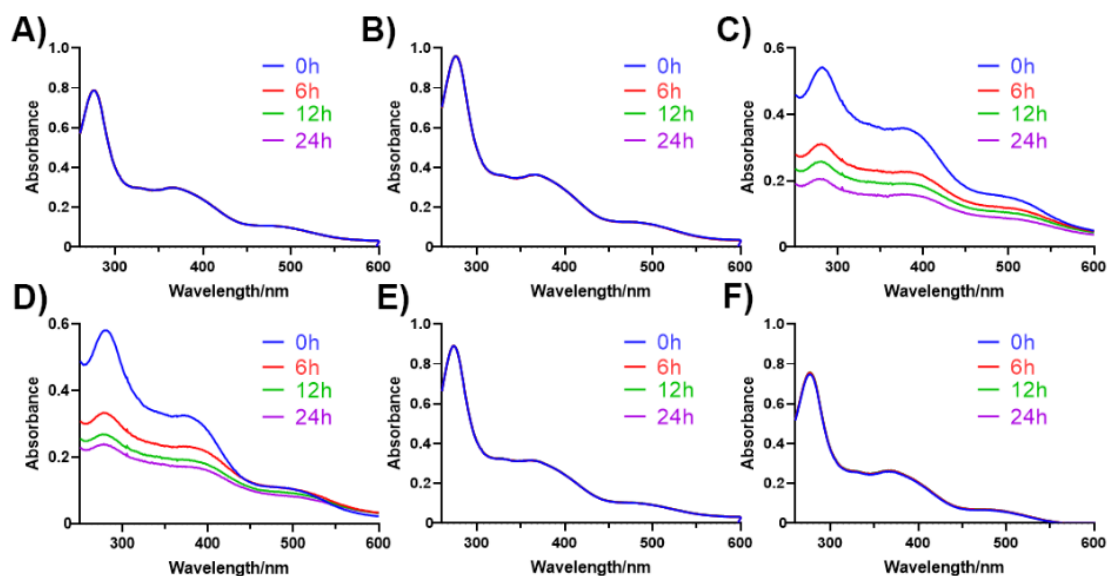

**Figure S8.** UV-vis spectra of 40 μM complexes 1–6 in PBS (1% DMSO) at different time intervals. A-F for 1–6.

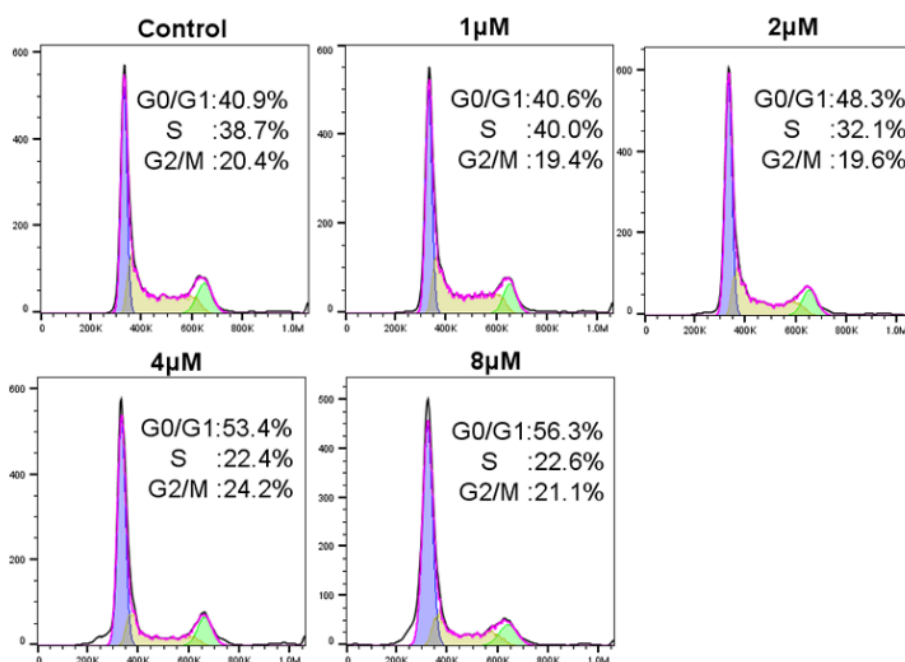

**Figure S9.** Effects of complex 6 treatment on cell-cycle phases in NCI-H460 cells as detected by propidium iodide (PI) staining with the flow cytometry. Cells were exposed to 6 for 24 h at indicated concentrations.

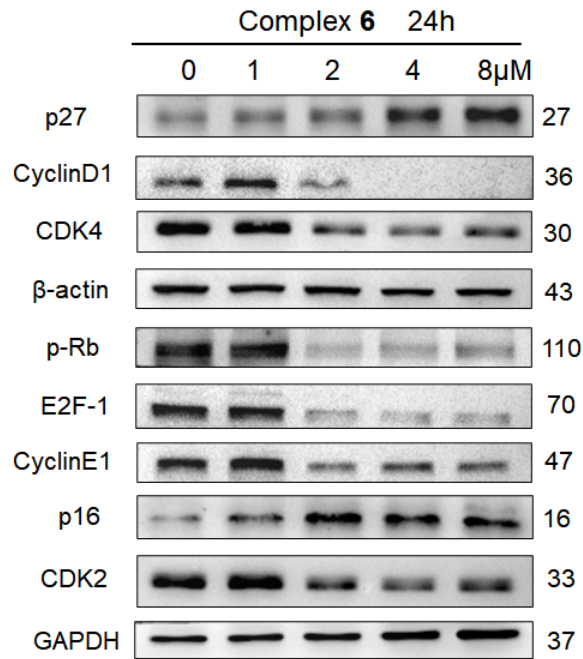

**Figure S10.** A western blot assay assessed the expression levels of G0/G1 cell phase arrest relevant protein in NCI-H460 cells after incubation with 6 at various concentrations for 24 h.

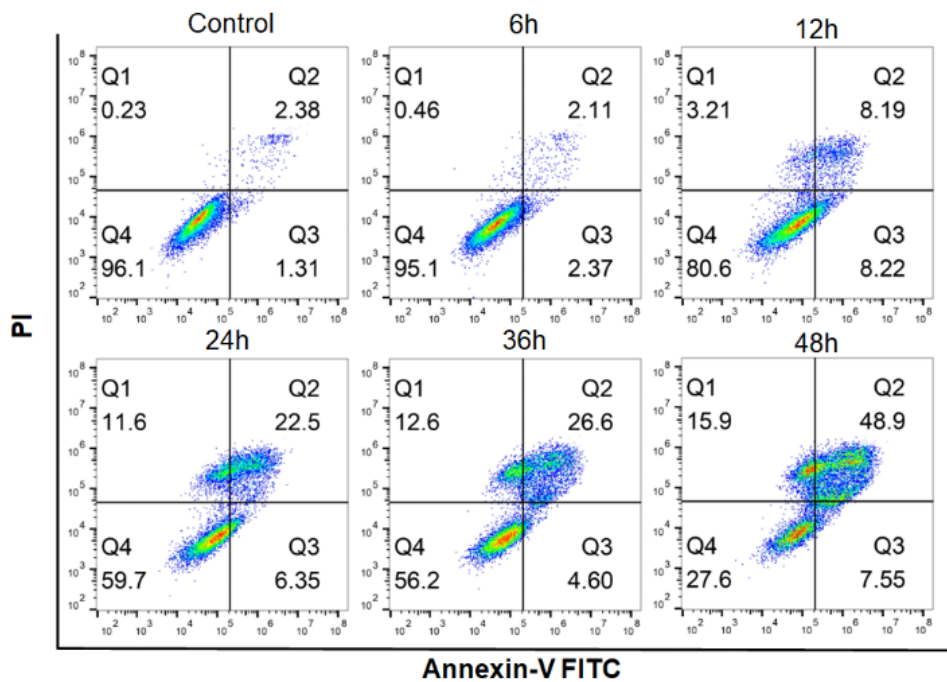

**Figure S11.** Time-dependent apoptosis detection in NCI-H460 cells with treatment of 8 $\mu$ M complex 6 using Annexin V-FITC and Propidium Iodide (PI) double staining.



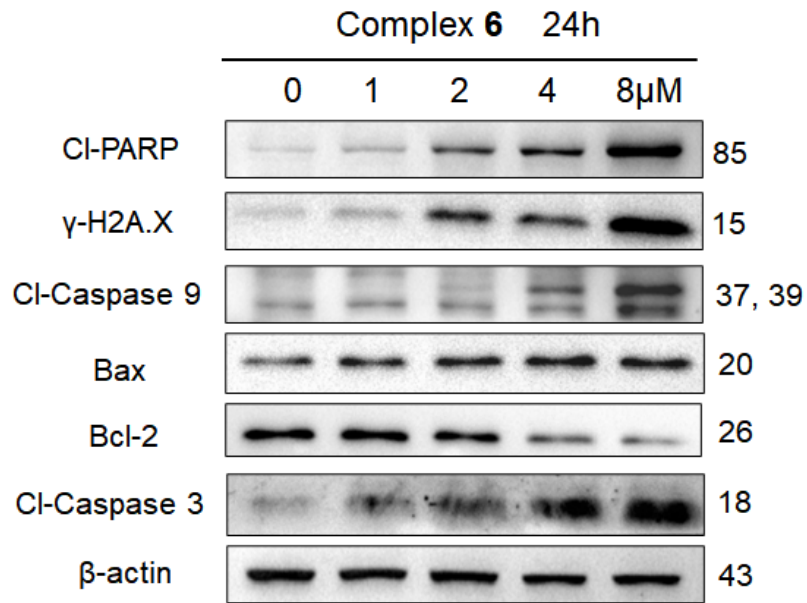

**Figure S12.** A western blot assay assessed the expression levels of apoptosis and DNA damage of the relevant proteins in NCI-H460 cells after incubation with various concentrations of **6** for 24 h.
